# Supplementary material
Source: PubMed Central journal article supplement (PMC7202442)
Supplement: NIHMS1578696-supplement-Updated_SDC_File.pdf [file NIHMS1578696-supplement-Updated_SDC_File.pdf]

# *Helicobacter pylori* treatment is not associated with *Clostridium difficile*

There is a concern that *H pylori* treatment can increase the risk of *C. difficile*

In this retrospective cohort study from the Veterans Health Administration, 0.74% of veterans with detected *H pylori* infection developed *C. difficile* infection within 3 months of *H pylori* detection and treatment

38,535 veterans

28,818 treated for *H pylori*

284 developed *C. difficile*

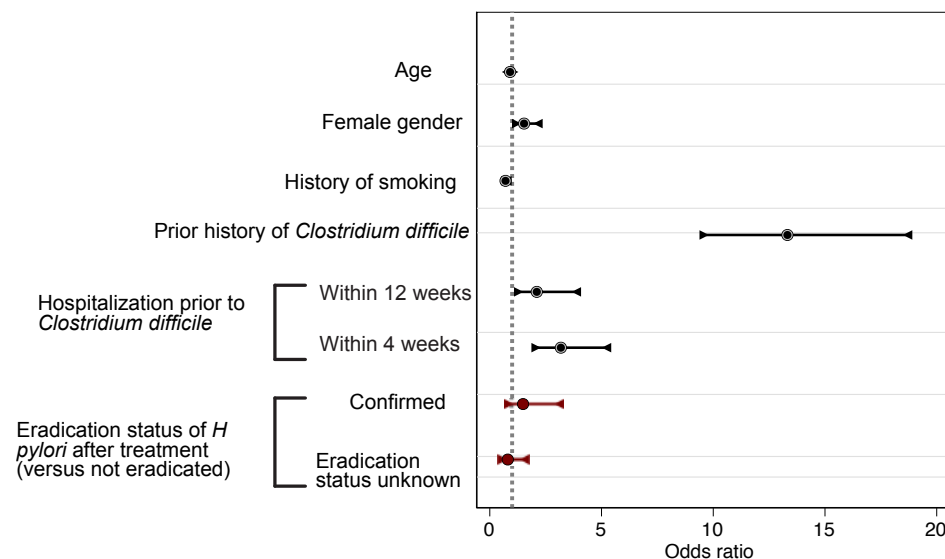

Prominent risk factors for *C. difficile* included hospital discharge within 12 weeks (OR 2.15; 95% CI:1.22-3.77) and 4 weeks (OR 3.46; 95% CI:2.18-5.48),  $p < 0.001$ , and prior *C. difficile* infection (OR 12.5; 95% CI:9.21-17.0,  $p < 0.001$ ). **Neither treatment nor eradication of *H pylori* was associated with future *C. difficile*.**
